# Supplementary material
Source: publisher site journal article supplement (https://www.dovepress.com/article/579943)
Supplement: Supplementary file 1 [file 579943%20Supplementary%20Materials.docx]

# Supplementary Material 1. Identification and selection criteria for the steering committee (SC) members.

The SC comprised six psychiatrists with expertise in Schizophrenia and the use of LAIs. They provided inputs on questionnaire design, recommended potential panelists, and assisted in survey development. The inclusion criteria for the SC were:

- Psychiatrists with more than 8 years' experience in Schizophrenia diagnosis, treatment, and management.
- Currently prescribing longer-interval LAIs (PP3M) to treat Schizophrenia patients.
- Meeting at least one of the following criteria in the past 5 years:
- Involvement in the development of current and/or historical clinical guidelines/consensus for Schizophrenia diagnosis and/or treatment management
- Active involvement in leadership roles or similar positions within a psychiatry society or association focused on Schizophrenia.
- Currently practicing in China

Specifically, the SC provided:

- Medical consultancy related to Schizophrenia throughout the study, including but not limited to validating the proposed survey questionnaire, suggesting panel expert screening criteria and / or nominations, and advising on targeted literature review search strategies and data mapping themes.
- Review and align on Delphi expert panel screener to determine eligibility criteria, TLR findings surrounding existing evidence, and survey statements and consensus-building questions. They evaluated Delphi expert panel composition to ensure alignment with study objectives and needs.
- Review and provide feedback on outputs after each round of Delphi panel consultation, identified potential bias, if any, and agreed on decisions to achieve consensus or reduce items if consensus is not achieved to minimize the risk of overburdening Delphi panelists.
- Participation in the final consensus meeting to align on key statements relating to the utilization of longer-interval LAIs with/without agreement to facilitate manuscript publication.

The SC did not participate in the Delphi panel.

# Supplementary Material 2.Targeted literature review search strategy

| **Aspects** | **Key words (English)** |
| --- | --- |
| **Schizophrenia** | - schizophrenia; schizophrenic |
| **LAI treatment** | - long-acting; - paliperidone palmitate |
| **Longer-intervals** | - 3-monthly; 6-monthly; 3-month; 6- month; once-every-3-months; once-every-6-months; PP3M; PP6M |
| **Section 1**. **Clinical necessity and potential benefits of "longer-interval LAIs"**: Why does schizophrenia patient require "longer-interval LAIs" and what are the potential benefits of using "longer-interval LAIs" in schizophrenia patients? | - effect; efficacy; effective; benefit - quality of life; relapse; mortality; death; function; - adherence; maintenance; persistence; consistence - economy; cost; expense; cost-effectiveness - burden; disease management |
| **Section 2**. **Target patients**: Patient characteristics which are more appropriate to use "longer-interval LAIs" and precautions for the use of "longer-interval LAIs" for special patients. | - eligible; eligibility; suitable; suitability; heterogeneity - preference; acceptance; willingness - PANSS; CGI-S |
| **Section 3. “Longer-interval LAIs” switching strategy:** specific considerations or assessment criteria. | - transition; switch; shift; - stabilize - assessment; evaluation |
| **Section 4**. **Long-term disease management after switching to "longer-interval LAIs"**: AE management, disease symptom monitoring, coping with psychotic episodes. | - management; monitoring; follow-up; - adverse reaction; safety - fluctuation; |
| **Section 5**. **Utilization improvement for “longer-interval LAIs”**: How to improve the use of "longer-interval LAIs" from the perspective of patients and physicians. | - recommendation; advice; - preference; - facilitator; barrier; |

# Supplementary Material 3. Detail scores for each statement in the two rounds.

Note: Statements in two rounds with wording modifications were listed in two rows, respectively.

|  |  | **Round 1** | | | | | **Round 2** | | | | |
| --- | --- | --- | --- | --- | --- | --- | --- | --- | --- | --- | --- |
| **No.** | **Statement** | **Median Score** | **Score Range** | **CV** | **Overall agreement, %** | **Median Score** | | **Score Range** | **CV** | **Overall agreement, %** |
| **clinical necessity of longer-interval LAIs** | | | | | | | | | | |
| 1.1 | PP1M significantly improves patient symptoms. After switching to longer-interval LAIs (e.g., PP3M, PP6M), the long-term symptom stability is comparable to PP1M. | 8 | 7-9 | 0.12 | 100.00% | 8 | | 7-9 | 0.09 | 100.00% |
| 1.2 | Longer-interval LAIs (e.g, PP3M, PP6M) can enhance patient adherence and drug persistence due to the reduced number of injections. | 8 | 6-9 | 0.15 | 84.62% | 8 | | 6-9 | 0.11 | 84.62% |
| 1.3 | For schizophrenic patients with poor adherence, longer-interval LAIs (e.g., PP3M, PP6M) can effectively reduce the relapse rates of disease.   - The relapse rates were similar in patients using PP3M and PP1M, and even lower in patients using PP3M, especially for those with poor adherence. - PP6M and PP3M have comparable effect on reducing the relapse rate of patients, with PP6M being even more effective. | 8 | 7-9 | 0.10 | 100.00% | 8 | | 7-9 | 0.10 | 100.00% |
| 1.4 | Longer-interval LAIs (e.g., PP3M) can delay the time to relapse (e.g., after discontinuation), particularly in patients with poor adherence. | 9 | 3-9 | 0.23 | 84.62% | 9 | | 7-9 | 0.08 | 84.62% |
| 1.5 | Longer-interval LAIs (e.g., PP3M) can reduce the number of outpatient/emergency visits and hospitalizations for patients. | 8 | 6-9 | 0.11 | 92.31% | 9 | | 8-9 | 0.06 | 92.31% |
| 1.6 | Longer-interval LAIs (e.g., PP3M) demonstrate superior functional recovery and quality of life improvement compared to PP1M, while also reducing total healthcare costs and disease burden, offering a cost-effectiveness advantage. | 8 | 5-9 | 0.17 | 84.62% | 9 | | 7-9 | 0.10 | 84.62% |
| 1.7 | The use of longer-interval LAIs enhances patients' quality of life and social functions while reducing the burden on caregivers and social management, including:   - Assisting patients in better integrating into society, promoting functional recovery, enhancing their quality of life and social functioning. - Improving patients' employment and increasing employment opportunity. - Mitigating the stigma associated with the disease. - Alleviating the burden on caregivers and community management. | 8 | 7-9 | 0.10 | 100.00% | 9 | | 7-9 | 0.09 | 100.00% |
| 1.8 | Switching from PP1M to longer-interval LAIs (e.g., PP3M) reduces the number of outpatient/emergency visits or hospitalizations due to relapse or disease exacerbation, thereby lowering the overall costs of outpatient/emergency visits or hospitalizations. | 9 | 7-9 | 0.09 | 100.00% | 9 | | 7-9 | 0.09 | 100.00% |
| **the target population for longer-interval LAIs** | | | | | | | | | | |
| 2.1 | Patients with a higher risk of relapse in schizophrenia are suitable for switching to longer-interval LAIs.   - Poor adherence/lack of insight of illness - Genetic predisposition/family history of schizophrenia - History of multiple relapses | 8 | 7-9 | 0.08 | 100.00% | 8 | | 7-9 | 0.08 | 100.00% |
| 2.2 | Patients with poor adherence to treatment or inconvenience in treatment, such as:   - Patients with low willingness to take medication, poor insight of illness, and a strong sense of stigma. - Frequent absences due to school or work, unstable living conditions, making long-term regular medical care and follow-up/supervision difficult. - Lack of family guardians or weak guardianship. - Lack of self-care ability. | 8 | 7-9 | 0.08 | 100.00% | 9 | | 8-9 | 0.04 | 100.00% |
| 2.3 | Patients such as students and working individuals who wish to preserve more social, are suitable for switching to longer-interval LAIs. | 9 | 8-9 | 0.06 | 100.00% | 9 | | 8-9 | 0.05 | 100.00% |
| 2.4 | Patients at risk of causing accidents are suitable for switching to longer-intervals of LAIs, such as:   - Aggressive or violent behavior and risk. - Self-harm or suicidal behavior and risk. - Comorbid substance abuse. - Comorbid personality disorders. | 9 | 4-9 | 0.18 | 92.31% | 9 | | 7-9 | 0.08 | 92.31% |
| 2.5 | Patients tend to prefer longer-interval LAIs. | 9 | 7-9 | 0.06 | 100.00% | 9 | | 9-9 | 0.00 | 100.00% |
| 2.6 | Patients with younger age or shorter-duration schizophrenia experience more significant clinical benefits after switching to longer-interval LAIs. | 8 | 5-9 | 0.19 | 69.23% | 8 | | 5-9 | 0.18 | 69.23% |
| 2.7 | Patients who have been treated with PP1M for over 4 months and shown significant improvement gain more clinical benefits after switching to longer-interval LAIs.   - Assessment of significant improvement: Clinical scales are frequently used to evaluate the improvement status of patients, such as the PANSS (Positive and Negative Syndrome Scale) scores, CGI-S (Clinical Global Impressions-Severity) scores, PSP (Personal and Social Performance) scores, BPI-S (Brief Psychiatric Rating Scale) scores, etc. | 8 | 3-9 | 0.22 | 84.62% | 9 | | 8-9 | 0.04 | 84.62% |
| **switching strategies for longer-interval LAIs** | | | | | | | | | | |
| 3.1 | Patients who received adequate treatment with PP1M and achieved stable condition are more likely to experience clinical benefits after the switch.   - Definition of adequate treatment: patients who have been treated with PP1M for at least 4 months and achieving stable condition, with the same dosage for the last 2 injections, and the initial dose of PP3M meets the requirements for the corresponding dose conversion from PP1M to PP3M | 9 | 6-9 | 0.11 | 92.31% | 9 | | 7-9 | 0.07 | 92.31% |
| 3.2 | To enhance the clinical benefits for patients, physicians should evaluate the tolerability and expected efficacy before switching to longer-interval LAIs. | 9 | 8-9 | 0.05 | 100.00% | 8 | | 5-9 | 0.14 | 100.00% |
| 3.3 | For patients treated with PP1M, switching to longer-interval LAIs is considered primarily based on whether the disease has stabilized.   - Typically, patients who have been treated with PP1M for 4 months and have met the criteria for stabilization are eligible for switching to longer-interval LAIs. | 9 | 6-9 | 0.15 | 84.62% | 9 | | 7-9 | 0.08 | 84.62% |
| 3.4 | Patients who have shown good tolerance to PP1M without experiencing serious adverse reactions may switch to longer-interval LAIs. | 9 | 7-9 | 0.07 | 100.00% | 9 | | 7-9 | 0.07 | 100.00% |
| 3.5 | In clinical practice, physicians can evaluate patients' symptom control through psychiatric examinations and scales, and assess adverse reactions using laboratory tests and examinations. Switching to longer-interval LAIs can be considered when patients are stable and have not experienced significant adverse reactions. | 8 | 6-9 | 0.15 | 76.92% | 9 | | 7-9 | 0.08 | 76.92% |
| 3.6 | Patients aiming to reduce the number of administration or enhance their quality of life may switch to longer-interval LAIs if their condition is stable after clinical assessment. | 9 | 7-9 | 0.07 | 100.00% | 9 | | 8-9 | 0.04 | 100.00% |
| 3.7 | Patients whose current medications do not have potential interactions with longer-interval LAIs may switch to longer-interval LAIs. | 9 | 4-9 | 0.18 | 92.31% | 9 | | 4-9 | 0.17 | 92.31% |
| 3.8 | Patients with more severe diseases, poorer functioning, relatively longer disease duration, and who have recently achieved symptom control may need to receive PP1M treatment for a longer period until their condition stabilizes before switching to longer-interval LAIs. | 8 | 6-9 | 0.14 | 84.62% | 9 | | 6-9 | 0.10 | 84.62% |
| **long-term disease management after switching to longer-interval LAIs** | | | | | | | | | | |
| 4.1 | After switching to longer-interval LAIs, the following monitoring is recommended:   - Symptom monitoring: Monitor whether new symptoms have appeared or existing symptoms have worsened by psychiatric examinations. It is recommended to use scales such as PANSS to measure symptom changes. - Adverse reactions monitoring: Monitor the patient's tolerance of LAIs and any adverse reactions. - Physiological indicators monitoring: Monitor the patient's weight, blood pressure, heart rate, and other physiological indicators. - Laboratory tests: Conduct complete blood count, blood biochemistry, prolactin levels, electrocardiograms, etc. - Social function monitoring: Evaluate the recovery of patients' social functions, including daily life abilities, work abilities, and social interaction abilities. | 9 | 8-9 | 0.06 | 100.00% | 9 | | 8-9 | 0.05 | 100.00% |
| 4.2 | After switching to longer-interval LAIs, medical institutions with the capability may conduct therapeutic drug monitoring. | 9 | 8-9 | 0.04 | 100.00% | 9 | | 8-9 | 0.03 | 100.00% |
| 4.3 | After switching to longer-interval LAIs, the follow-up interval should be adjusted based on the stabilization of the disease at any time:   - Patients with a stable condition and no symptomatic fluctuations can be followed up at least once every 3 months according to the dosing interval. - The follow-up interval can be shortened in case of fluctuating symptoms or adverse reactions, and if necessary, the patient can visit the nearest medical institutions for a re-visit or consult through online medical care. | 9 | 7-9 | 0.07 | 100.00% | 9 | | 7-9 | 0.07 | 100.00% |
| 4.4 | Patients taking other antipsychotics in combination should have their monitoring and follow-up plans adjusted to account for the combination of medications, and the follow-up interval should be shortened if necessary. | 9 | 7-9 | 0.07 | 100.00% | 9 | | 7-9 | 0.06 | 100.00% |
| 4.5 | The adverse effect profile of LAIs is generally similar to that of their oral forms. Therefore, common adverse reactions to LAIs and their management can be modeled after the common adverse reactions to oral antipsychotics and their management protocols. | 9 | 8-9 | 0.06 | 100.00% | 9 | | 8-9 | 0.05 | 100.00% |
| 4.6 | After switching to longer-interval LAIs, patients generally exhibit favorable tolerance. The incidence of adverse reactions is comparable to or lower than those observed with PP1M, and no new safety risks have been identified. | 9 | 8-9 | 0.06 | 100.00% | 9 | | 8-9 | 0.06 | 100.00% |
| 4.7 | If adverse reactions occur after switching to longer-interval LAIs:   - Receive targeted symptomatic treatment based on the specific adverse reactions, similar to the management principles of adverse reactions to oral antipsychotics. - If symptomatic treatment is ineffective, consider reducing the dose of the longer-interval LAIs, taking into account the long-acting release characteristics and the longer apparent half-life of paliperidone. - If dose reduction is still ineffective, consider extending the injection interval (e.g., PP3M can be extended to 13-14 weeks) or switching medications. - Due to the longer half-life of longer-interval LAIs, symptom changes may appear later after switching. If severe adverse reactions persist after discontinuation, methods such as fluid expansion can be used to promote drug metabolism and excretion. | 8 | 6-9 | 0.12 | 92.31% | 9 | | 6-9 | 0.10 | 92.31% |
| 4.8 | If the patient experiences fluctuating symptoms after switching to longer-interval LAIs, the following measures may be considered as appropriate:   - Combine with oral antipsychotic treatment. - Increase the injection dose of longer-interval LAIs. - Shorten the injection interval of longer-interval LAIs (e.g., PP3M shortened to 10-11 weeks). | 9 | 8-9 | 0.06 | 100.00% | 9 | | 8-9 | 0.03 | 100.00% |
| 4.9 | If the patient encounters complications like fluctuating symptoms and severe adverse reactions after switching to longer-interval LAIs, the community physician should promptly seek help from a psychiatric specialist or arrange for the patient to be transferred to a hospital for treatment. | 9 | 8-9 | 0.04 | 100.00% | 9 | | 9-9 | 0.00 | 100.00% |
| **Factors influencing treatment willingness of longer-interval LAIs** | | | | | | | | | | |
| 5.1 | Factors influencing a patient's willingness to switch to longer-interval LAIs include:   - Stable efficacy: Better symptom stabilization and prevention of relapse. - Fewer outpatient/emergency visits and shorter hospital stays. - Improved adherence. - Reduced medication/injections frequency. - Greater convenience. - Enhanced quality of life, normalization of daily activities, and increased activity levels. - Reduced economic burden - Increased social participation - Reduced stigma. - Less burden on caregivers. | 8 | 8-9 | 0.06 | 100.00% | 9 | | 8-9 | 0.06 | 100.00% |
| 5.2 | Physicians need to reasonably explain the benefits of longer-interval LAIs to patients and their caregivers, emphasizing the importance of long-term regular medication for disease control and relapse prevention, and building patient confidence in treatment. Specific benefits include:   - Stable efficacy: better symptom stabilization and prevention of relapse. - Fewer hospital admissions and shorter hospital stays. - Improved adherence. - Stability and good tolerance with previous PP1M use. - Reduced medication/injection frequency. - Simplified treatment regimen, and enhanced convenience for patients. - More conductive to the recovery of patients’ social and psychosocial functioning. - Improved quality of life and normalization of daily living. - Reduced overall costs and economic burden. - Reduced burden on caregivers. | 8 | 8-9 | 0.06 | 100.00% | 8 | | 8-9 | 0.06 | 100.00% |
| 5.3 | In communication with patients and their caregivers, it is important to:   - Highlight the consistent efficacy of 'longer-interval LAIs' and the advantages of reducing the number of injections, etc. - Tailor communication priorities to the different needs of patients. | 9 | 6-9 | 0.10 | 92.31% | 9 | | 8-9 | 0.05 | 92.31% |
| 5.4 | Physicians should objectively inform patients and their caregivers about the efficacy, tolerability, and potential adverse reactions of longer-interval LAIs to alleviating patients' concerns after switching medications. | 9 | 7-9 | 0.08 | 100.00% | 9 | | 8-9 | 0.04 | 100.00% |
| 5.5 | Physicians should stress the significance of disease monitoring and continuous communication to patients and their caregivers when recommending longer-interval LAIs, primarily including:   - The need for ongoing monitoring of the condition, with timely medical attention if there are changes in symptoms (e.g., new or worsening symptoms). - The importance of maintaining regular follow-up visits and communicate with healthcare providers to promptly report changes in the condition and treatment response, allowing for timely adjustments to the treatment plan. | 9 | 8-9 | 0.05 | 100.00% | 9 | | 8-9 | 0.04 | 100.00% |
